# Supplementary material
Source: PubMed Central journal article supplement (PMC5106524)

## **ONLINE DATA SUPPLEMENT:**

# **A Critical Role for p130<sup>Cas</sup> in the Progression of Pulmonary Hypertension in Humans and Rodents**

### ***Tu: p130<sup>Cas</sup> Over-Expression in Pulmonary Hypertension***

Ly Tu<sup>1,2</sup>, Frances S. De Man<sup>1,2,3</sup>, Barbara Girerd<sup>1,2,4</sup>, Alice Huertas<sup>1,2</sup>, Marie-Camille Chaumais<sup>1,2</sup>, Florence Lecerf<sup>1,2</sup>, Charlène François<sup>1,2</sup>, Frédéric Perros<sup>1,2</sup>, Peter Dorfmueller<sup>1,2</sup>, Elie Fadel<sup>1,2</sup>, David Montani<sup>1,2,4</sup>, Saadia Eddahibi<sup>1,2</sup>, Marc Humbert<sup>1,2,4</sup>, Christophe Guignabert<sup>1,2,#</sup>.

<sup>1</sup>INSERM UMR 999, LabEx LERMIT, Centre Chirurgical Marie Lannelongue, Le Plessis-Robinson, France; <sup>2</sup>Univ Paris-Sud, School of medicine, Kremlin-Bicêtre, France; <sup>3</sup>VU University Medical Center, Amsterdam, The Netherlands; <sup>4</sup>AP-HP, Service de Pneumologie, Centre de Référence de l'Hypertension Pulmonaire Sévère, DHU Thorax Innovation, Hôpital de Bicêtre, France.

### ***Patients with Pulmonary Arterial Hypertension (PAH) and Controls***

Blood samples and clinical data from 37 patients with PAH (n=21 idiopathic (iPAH); n=16 heritable (hPAH)) and from 40 control subjects were collected (Table.1). In addition, blood samples from asthmatic patients (n=9) and from 15 control subjects were also collected. The asthmatic patients had persistent bronchial asthma and were clinically stable at the time of the study: clinical stability was defined as the absence of an infection or other type of exacerbation necessitating an alteration in medication during the past 8 weeks. The patients had no systemic corticosteroids therapy during the past 8 weeks. At the time of the study, there was also no clinical or laboratory evidence of any other medical conditions which could cause an increase in inflammatory mediators. For the preparation of cultured cells and for *in situ* studies, we studied lung specimens obtained during lung transplantation in 7 patients with iPAH and during lobectomy or pneumonectomy for localized lung cancer in 7 controls (Table.2). Preoperative echocardiological evaluation including echocardiography was performed in the controls to rule out PH, and the lung specimens from the controls were collected at distance from tumor foci. This study was approved by the local ethics committee

(CPP Ile-de-France VII, Le Kremlin-Bicêtre, France). All patients gave informed consent before the study.

### ***Isolation and Culture of Human PA-SMCs and P-ECs***

Human PA-SMCs and P-ECs were isolated and cultured as previously described (1, 2). Cells were used between passages 3 and 6.

### ***Cell Proliferation and Cell Migration Assays***

Cell proliferation was determined by measuring 5-bromo-2-deoxyuridine (BrdU) incorporation with the DELFIA® Cell proliferation kit (PerkinElmer, Courtaboeuf, France) and Time-resolved fluorometer EnVision™ Multilabel Reader (PerkinElmer)(3). In addition, direct cell counting was also performed. For migration assays, cell culture inserts for 24 well plates, 8µm pore size, polyethylene terephthalate (PET) membranes (VWR, Fontenay-sous-Bois, France), were coated with 0.5% gelatin (Sigma-Aldrich, Saint-Quentin Fallavier, France). Human PA-SMCs and P-ECs were seeded at a density of  $50 \times 10^3$  to each insert for 24h. The migratory stimulus was added to 750µl of medium in the well in the bottom of the chamber and the chambers incubated at 37°C under 5% CO<sub>2</sub> for 6h. The inserts were removed and cells scraped off the top of the insert, the cells that had migrated to the bottom of the insert were fixed and stained with crystal violet (0.09% crystal violet; 7% reagent alcohol) (Sigma-Aldrich). The cells in three different fields (200-400x) at the center of each well were counted under the microscope.

### ***Western blot, ELISA and Immunostaining***

PA-SMCs and P-ECs were homogenized and sonicated in PBS containing protease and phosphatase inhibitors (Sigma-Aldrich). Fifty µg of protein extract was used to detect p130<sup>Cas</sup> (1:500; Tebu-Bio, Le Perray-en-Yvelines, France), phospho-(Y165)-p130<sup>Cas</sup> (1:250; Ozyme, Saint Quentin Yvelines, France), phospho-ERK1/2, and ERK1 (1:250; Tebu-Bio, Le perray-en-Yvelines, France) by SDS-PAGE as previously described (3). Equal protein loading was

confirmed by blotting for  $\beta$ -actin (1:5000, Sigma-Aldrich). Circulating p130<sup>Cas</sup> levels were assayed by enzyme-linked immunosorbent assay (ELISA) using a human p130<sup>Cas</sup> ELISA kit (Shanghai Boyun Biotech Co., Ltd. Shanghai, China). The procedures were performed according to the manufacturer's instructions. For immunochemistry, paraffin-embedded sections were incubated overnight at +4°C with antibodies to phospho-(Y165)-p130<sup>Cas</sup> and p130<sup>Cas</sup> (1:200) as previously described (3, 4). For immunofluorescent staining, cells were fixed in methanol and stained for p130<sup>Cas</sup> (1:500), and phospho-(Y165)-p130<sup>Cas</sup> (1:250). Observations were made by scanning laser confocal microscopy (Zeiss LSM700, Zeiss, Le Pecq, France).

### ***Gelatin Zymography***

For gelatin zymography, 8% SDS-PAGE co-polymerized with gelatin (1mg/mL) was used. The gel was washed for 1h at room temperature in 2.5% (v/v) Triton X-100, transferred to an enzyme assay buffer (0.1M Tris, pH=7.4, 10mM CaCl<sub>2</sub>) and incubated for 24h at 37°C. The gel was stained with 0.05% Coomassie brilliant blue G-250 in a mixture of propanol-2: acetic acid: water (3:1:6 by volume) and de-stained in 5% ethanol with 7.5% acetic acid. Areas of proteolysis appeared as clear zones against a blue background.

### ***Animal Models and Hemodynamic Measurements***

Adult male Wistar rats (100 g) were studied 4 weeks after a single subcutaneous injection of monocrotaline (60 mg/Kg) or vehicle (n=5 for each group) (1). In an additional experiment, 20 rats given monocrotaline were left untreated for 2 weeks then randomly divided into four groups (5 animals in each group), of which three were treated with the PDGF-R inhibitor imatinib (50 mg/kg/day (5)), the EGF-R inhibitor gefitinib (50 mg/kg/day (6)), and the FGF-R inhibitor dovitinib (30 mg/kg/day (7)) for 2 weeks respectively and the other were given the vehicle for 2 weeks (dimethyl sulfoxide or DMSO). All treatments were given once a day by intraperitoneal injection. Concerning the pneumonectomy-monocrotaline model in rat,

animals received a single subcutaneous monocrotaline-treatment on day 0 and subsequently underwent left pneumonectomy on day 7 (n=5) and all rats were studied at day 40(8). C57BL/6 mice (12 weeks of age) were either studied in room air, or were exposed to hypoxia (10% oxygen) for 3 weeks (n=5 for each group)(9, 10). All rats and mice were anesthetized with isoflurane. A polyvinyl catheter was introduced into the right jugular vein and pushed through the right ventricle into the pulmonary artery. Another polyethylene catheter was inserted into the right carotid artery. After measurement of hemodynamic parameters, the thorax was opened and the left lung immediately removed and frozen. The heart was dissected and weighed for calculation of the right ventricular hypertrophy (RVH) index. The right lung was fixed in the distended state with formalin buffer. After paraffin embedding, 5 µm-thick lung sections were stained with hematoxylin-eosin. In each animals, 40-60 intraacinar arteries were analyzed and categorized as muscular and nonmuscular to assess the distribution and degree of muscularization. Animal studies were approved by the administrative panel on animal care at Centre de Chirurgie Expérimentale Marie Lannelongue, Le Plessis-Robinson, France.

### **Statistical Analyses**

Values of each variable are expressed as means±SEM. Statistical significance was tested using the nonparametric Mann-Whitney test or two-way ANOVA with Bonferroni post hoc tests. *P* values < 0.05 were considered statistically significant.

### **References:**

1. Guignabert C, Raffestin B, Benferhat R, Raoul W, Zadigue P, Rideau D, Hamon M, Adnot S, Eddahibi S. Serotonin transporter inhibition prevents and reverses monocrotaline-induced pulmonary hypertension in rats. *Circulation* 2005;111:2812-2819.

2. Izikki M, Guignabert C, Fadel E, Humbert M, Tu L, Zadigue P, Darteville P, Simonneau G, Adnot S, Maitre B, Raffestin B, Eddahibi S. Endothelial-derived fgf2 contributes to the progression of pulmonary hypertension in humans and rodents. *J Clin Invest* 2009;119:512-523.
3. Tu L, Dewachter L, Gore B, Fadel E, Darteville P, Simonneau G, Humbert M, Eddahibi S, Guignabert C. Autocrine fibroblast growth factor-2 signaling contributes to altered endothelial phenotype in pulmonary hypertension. *Am J Respir Cell Mol Biol* 2011;45:311-322.
4. Guignabert C, Tu L, Izikki M, Dewachter L, Zadigue P, Humbert M, Adnot S, Fadel E, Eddahibi S. Dichloroacetate treatment partially regresses established pulmonary hypertension in mice with sm22alpha-targeted overexpression of the serotonin transporter. *The FASEB journal : official publication of the Federation of American Societies for Experimental Biology* 2009;23:4135-4147.
5. Schermuly RT, Dony E, Ghofrani HA, Pullamsetti S, Savai R, Roth M, Sydykov A, Lai YJ, Weissmann N, Seeger W, Grimminger F. Reversal of experimental pulmonary hypertension by pdgf inhibition. *J Clin Invest* 2005;115:2811-2821.
6. Dahal BK, Cornitescu T, Tretyn A, Pullamsetti SS, Kosanovic D, Dumitrascu R, Ghofrani HA, Weissmann N, Voswinckel R, Banat GA, Seeger W, Grimminger F, Schermuly RT. Role of epidermal growth factor inhibition in experimental pulmonary hypertension. *Am J Respir Crit Care Med*;181:158-167.
7. Azab AK, Azab F, Quang P, Maiso P, Sacco A, Ngo HT, Liu Y, Zhang Y, Morgan BL, Roccaro AM, Ghobrial IM. Fgfr3 is overexpressed waldenstrom macroglobulinemia and its inhibition by dovitinib induces apoptosis and overcomes stroma-induced proliferation. *Clinical cancer research : an official journal of the American Association for Cancer Research* 2011;17:4389-4399.
8. Dorfmueller P, Chaumais MC, Giannakouli M, Durand-Gasselien I, Raymond N, Fadel E, Mercier O, Charlotte F, Montani D, Simonneau G, Humbert M, Perros F. Increased

- oxidative stress and severe arterial remodeling induced by permanent high-flow challenge in experimental pulmonary hypertension. *Respiratory research* 2011;12:119.
9. Guignabert C, Alvira CM, Alastalo TP, Sawada H, Hansmann G, Zhao M, Wang L, El-Bizri N, Rabinovitch M. Tie2-mediated loss of peroxisome proliferator-activated receptor-gamma in mice causes pdgf receptor-beta-dependent pulmonary arterial muscularization. *Am J Physiol Lung Cell Mol Physiol* 2009;297:L1082-1090.
  10. Guignabert C, Izikki M, Tu LI, Li Z, Zadigue P, Barlier-Mur AM, Hanoun N, Rodman D, Hamon M, Adnot S, Eddahibi S. Transgenic mice overexpressing the 5-hydroxytryptamine transporter gene in smooth muscle develop pulmonary hypertension. *Circ Res* 2006;98:1323-1330.

**Table 1** - Characteristics Of Controls And Patients With PAH For Determination Of Serum p130<sup>cas</sup> Protein Levels:

|                                         | <b>PAH</b><br>n=37 | <b>Controls</b><br>n=40 |
|-----------------------------------------|--------------------|-------------------------|
| <b>Age, yrs</b>                         | 50.4 ± 2.7         | 41.9 ± 2.1              |
| <b>Sex, M/F (ratio)</b>                 | 10 / 27 (0.4)      | 19 / 21 (0.9)           |
| <b>Mutation in <i>BMPR2</i> gene, n</b> |                    |                         |
| Carrier                                 | 16                 | NA                      |
| No-carrier                              | 21                 | NA                      |
| <b>NYHA functional class, n</b>         |                    |                         |
| class I                                 | 1                  | NA                      |
| class II                                | 24                 | NA                      |
| class III                               | 12                 | NA                      |
| <b>6-MWD, m</b>                         | 445 ± 20           | NA                      |
| <b>mPAP, mmHg</b>                       | 49.3 ± 2.4         | NA                      |
| <b>CI, l/min/m<sup>2</sup></b>          | 3.10 ± 0.16        | NA                      |
| <b>PVRi, mmHg/l/min/m<sup>2</sup></b>   | 8.7 ± 0.7          | NA                      |
| <b>PCWP, mmHg</b>                       | 7.6 ± 0.7          | NA                      |
| <b>Specific PAH Therapy</b>             |                    |                         |
| - ERA                                   | 31                 | NA                      |
| - PDE5i                                 | 27                 | NA                      |
| - Prostanoids                           | 16                 | NA                      |
| - CCB                                   | 7                  | NA                      |
| - No Treatment                          | 0                  | NA                      |

6-MWD=6-minute walk test; CCB=calcium channel blocker;  
CI=cardiac index; ERA=endothelin receptor antagonists;  
mPAP=mean pulmonary artery pressure; NA=No applicable;  
NYHA=New York Heart Association; PCWP=pulmonary capillary  
wedge pressure; PDE5i=phosphodiesterase 5 inhibitors; PVRi=  
pulmonary vascular resistance index

**Table 2** - Characteristics Of Controls And Patients With iPAH Before Lung Transplantation:

|                                         | <b>iPAH</b><br>n=7 | <b>Controls</b><br>n=7 |
|-----------------------------------------|--------------------|------------------------|
| <b>Age, yrs</b>                         | 39.8 ± 2.2         | 46.4 ± 2.3             |
| <b>Sex, M/F (ratio)</b>                 | 2 / 5 (0.40)       | 2 / 5 (0.40)           |
| <b>Mutation in <i>BMPR2</i> gene, n</b> |                    |                        |
| Carrier                                 | 0                  | NA                     |
| No-carrier                              | 7                  | NA                     |
| <b>NYHA functional class, n</b>         |                    |                        |
| class III                               | 2                  | NA                     |
| class IV                                | 5                  | NA                     |
| <b>mPAP, mmHg</b>                       | 69.9 ± 2.1         | NA                     |
| <b>CI, l/min/m<sup>2</sup></b>          | 2.6 ± 0.1          | NA                     |
| <b>PVRi, mmHg/l/min/m<sup>2</sup></b>   | 14.6 ± 0.6         | NA                     |
| <b>PCWP, mmHg</b>                       | 8 ± 0.5            | NA                     |

CI=cardiac index; mPAP=mean pulmonary artery pressure; NA= no applicable; NYHA=New York Heart Association; PCWP=pulmonary capillary wedge pressure; PVRi= pulmonary vascular resistance index



**Supplemental Fig. S1 :** Serum p130<sup>Cas</sup> Protein Levels in Asthmatic Patients versus Controls.  
Values are means±SEM.

**Fig. S1**

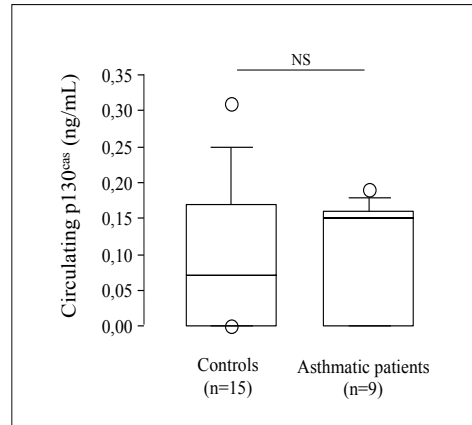

**Supplemental Fig. S2 : Suppression of p130<sup>Cas</sup> Protein By RNA-interference 72 Hours After Transfection of Human PA-SMCs and PECs.** Representative Western immunoblots of p130<sup>Cas</sup> and  $\beta$ -actin loading controls and quantification of the p130<sup>Cas</sup>/  $\beta$ -actin ratio. Values are means $\pm$ SEM (n=5).

**Fig. S2**

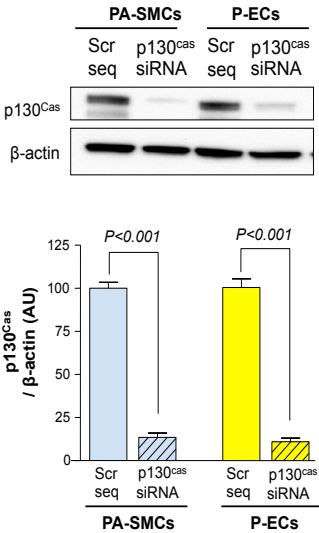

**Supplemental Fig. S3 :** Proliferation of PA-SMCs and P-ECs assessed by Cell Count. Proliferative potential of PA-SMCs and P-ECs from patients with iPAH and controls in presence or absence of EGF, FGF2 and PDGF (10ng/ml; 48 hours). Values are means±SEM (n=5).

**Fig. S3**

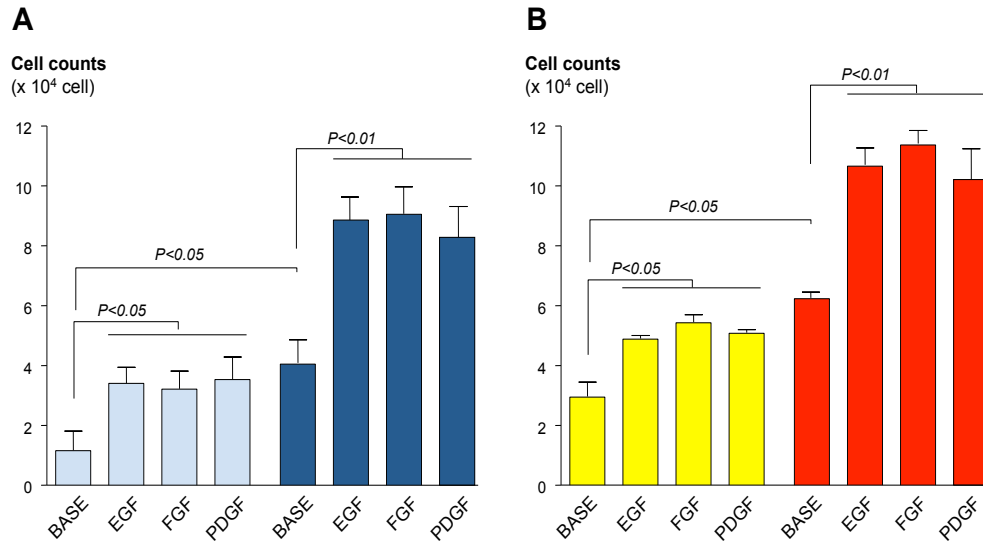

**Supplemental Fig. S4 : Time Course of p130<sup>Cas</sup> Activation.** Representative Western blots of phospho-p130<sup>Cas</sup> and  $\beta$ -actin loading controls in PA-SMCs in presence or in absence of EGF, FGF2 and PDGF (10 ng/ml).

**Fig. S4**

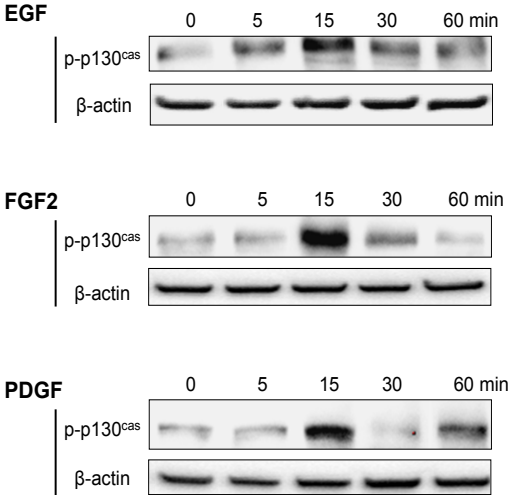

**Supplemental Fig. S5 : Pulmonary Hemodynamic and Vascular Remodeling in Rat Lungs With Monocrotaline-induced PH.** RVSP, mPAP, RVH and percentage of muscularized pulmonary arteries (A) at day-15 and (B) day-30 in monocrotaline-injected rats and controls. Values are means±SEM (n=5).

**Fig. S5**

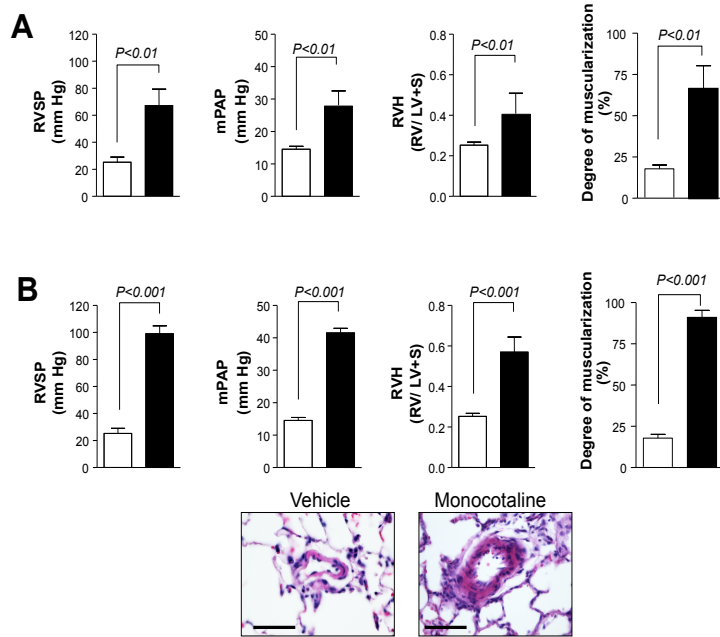

**Supplemental Fig. S6 : Pulmonary Hemodynamic and Vascular Remodeling in Mouse Lungs With Chronic Hypoxia-induced PH.** RVSP, RVH and percentage of muscularized pulmonary arteries in mice exposed to hypoxia (10%  $\text{fiO}_2$ ) or kept in room air for 3 weeks. Values are means $\pm$ SEM (n=5).

**Fig. S6**

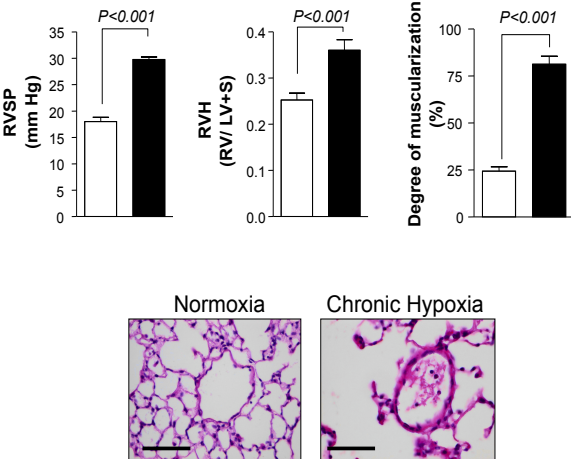

**Supplemental Fig. S7 : p130<sup>Cas</sup> expression in the pneumonectomy with monocrotaline-induced PH in rats.** Representative images of Von Willebrand factor (vWF),  $\alpha$ -smooth muscle actin and p130<sup>Cas</sup> immunostaining in serial sections of distal pulmonary arteries from pneumonectomy-monocrotaline-injected rats:. Scale bar= 50 $\mu$ m.

**Fig. S7**

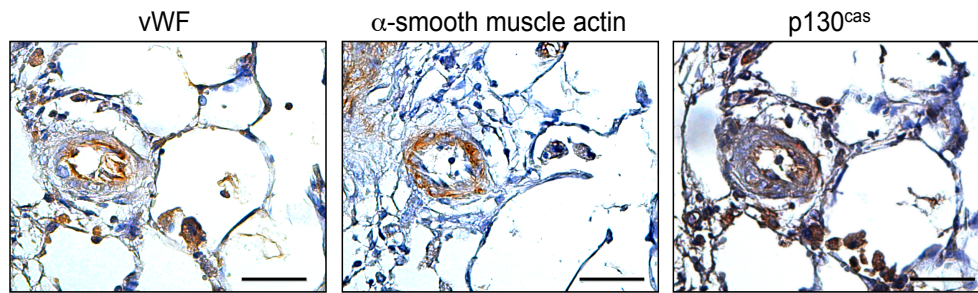

Supplement: halms905191-supplement_1.pdf [file halms905191-supplement_1.pdf]
